# Supplementary material for: Predicting Outcomes in Patients With Diffuse Large B-Cell Lymphoma Treated With Standard of Care
Source: PubMed Central journal article supplement (PMC6421613; doi:10.1177/1176935119835538), 2019-03-15
Supplement: Supplemental_material.pdf [file Supplemental_material.pdf]

## SUPPLEMENTARY INFORMATION

**Table S1** Predictive models: Overview

| <b>Predictive model</b>                                 | <b>Description</b>                                                                                                                                                                                                                                                         |
|---------------------------------------------------------|----------------------------------------------------------------------------------------------------------------------------------------------------------------------------------------------------------------------------------------------------------------------------|
| LASSO (Least Absolute Shrinkage and Selection Operator) | Models the dependent variable while automatically selecting significant variables by shrinking the coefficients of unimportant predictors to zero.                                                                                                                         |
| Naive Bayes                                             | Assumes the value of a particular feature is independent of the value of any other feature                                                                                                                                                                                 |
| Gradient boosting machine                               | Captures complex non-linear function dependencies builds an ensemble of trees one-by-one, then the predictions of the individual trees are summed                                                                                                                          |
| Random forest                                           | Operates by constructing multiple decision trees; the sum of the predictions made from the decision trees determines the overall prediction of the forest.                                                                                                                 |
| Neural network model                                    | Organized in a series of layers, where the input vector enters at the left side of the network, which is then projected to a “hidden layer.” Each unit in the hidden layer is a weighted sum of the values in the first layer. This layer then projects to an output layer |

**Figure S1** Gradient Boosting Machine: Performance metrics, observation period  $\leq 1$  year post-index date

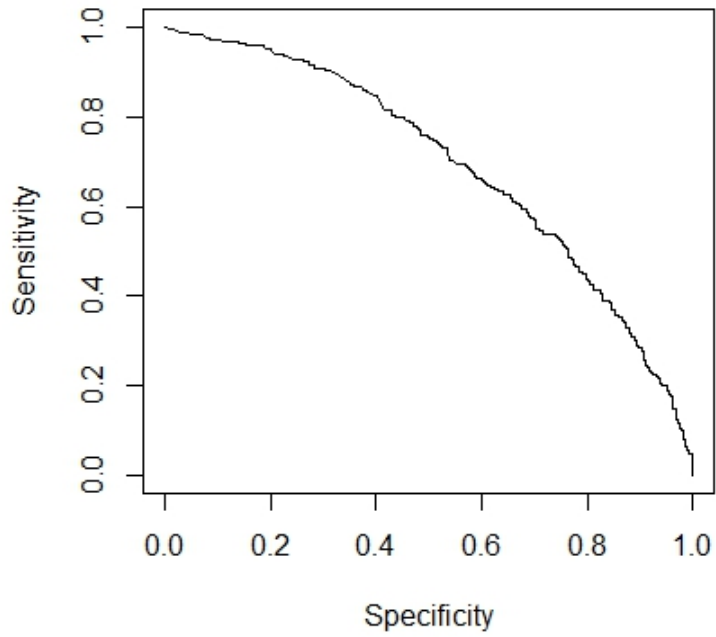

|           | observed |     |
|-----------|----------|-----|
| predicted | 0        | 1   |
| 0         | 483      | 165 |
| 1         | 232      | 245 |

sensitivity: 0.597561

specificity: 0.6755245

**Figure S2** Gradient Boosting Machine: Performance metrics, observation period  $\leq 3$  years post-index date

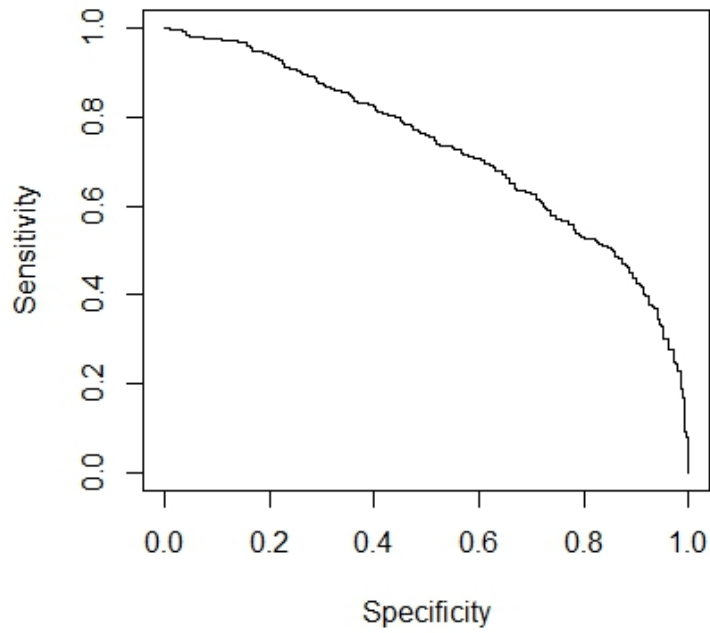

|           | observed |     |
|-----------|----------|-----|
| predicted | 0        | 1   |
| 0         | 226      | 262 |
| 1         | 37       | 254 |
